# Supplementary material
Source: publisher site journal article supplement (https://www.dovepress.com/article/379468)
Supplement: Supplementary file 1 [file get_supplementary_file.php]

**Supplementary Table 1 The primer sequences for qRT-PCR.**

| Target genes | Forward (5’-3’) | Reverse (5’-3’) |
| --- | --- | --- |
| *ALP* | CGGACCATTCCCACGTCTTC | CATTCTCTCGTTCACCGCCC |
| *RUNX2* | CGAATGGCAGCACGCTATTAA | GTCGCCAAACAGATTCATCCA |
| *RANKL* | GAACCAGATGGGATGTCGGT | AGAGAAAGCGATGGTGGATGG |
| *OPG* | GTGGAATAGATGTTACCCTGTGTG | TGCGTTTACTTTGGTGCCAG |
| *GAPDH* | GCACCGTCAAGGCTGAGAAC | TGGTGAAGACGCCAGTGGA |
